# Supplementary material for: The synthesis and topochemical polymerization of o-carborane-based diacetylene macrocycles
Source: Royal Society of Chemistry journal article supplement (doi:10.1039/d3nj03491g), 2023-01-01
Supplement: d3nj03491g1.pdf [file d3nj03491g1.pdf]

## Supporting Information

### **The Synthesis and Topochemical Polymerisation of o-Carborane-based Diacetylene Macrocycles**

Meigui Fu,<sup>a</sup> Shuai Yuan,<sup>a</sup> Qi Qu,<sup>a</sup> Yaofeng Yuan,<sup>\*a</sup> Caixia Lin,<sup>\*a</sup> and Yanhou Geng<sup>\*b</sup>

*a Key Laboratory of Molecule Synthesis and Function Discovery (Fujian Province University), Department of Chemistry, Fuzhou University, Fuzhou 350108, China.*

*b School of Materials Science and Engineering and Tianjin Key Laboratory of Molecular Optoelectronic Science, Tianjin University, Tianjin 300072, China; Joint School of National University of Singapore and Tianjin University, International Campus of Tianjin University, Fuzhou 350207, China.*

Email: yaofeng.yuan@fzu.edu.cn; lincaixia\_fzu@fzu.edu.cn; yanhou.geng@tju.edu.cn

### **Table of Contents**

|                                                                                               |           |
|-----------------------------------------------------------------------------------------------|-----------|
| <b>1. <sup>1</sup>H and <sup>13</sup>C NMR Spectra and HR-MS (ESI) of New Compounds .....</b> | <b>1</b>  |
| <b>2. DSC plots of crystals of macrocycle CBMC-2.....</b>                                     | <b>7</b>  |
| <b>3. TGA plot of crystals of macrocycle CBMC-2.....</b>                                      | <b>8</b>  |
| <b>4. X-ray crystallography data of macrocycle CBMC-1 and CBMC-2.....</b>                     | <b>9</b>  |
| <b>5. FT-IR spectra of CBMC-2 and PDAs .....</b>                                              | <b>12</b> |

# 1. $^1\text{H}$ and $^{13}\text{C}$ NMR Spectra and HR-MS (ESI) of New Compounds

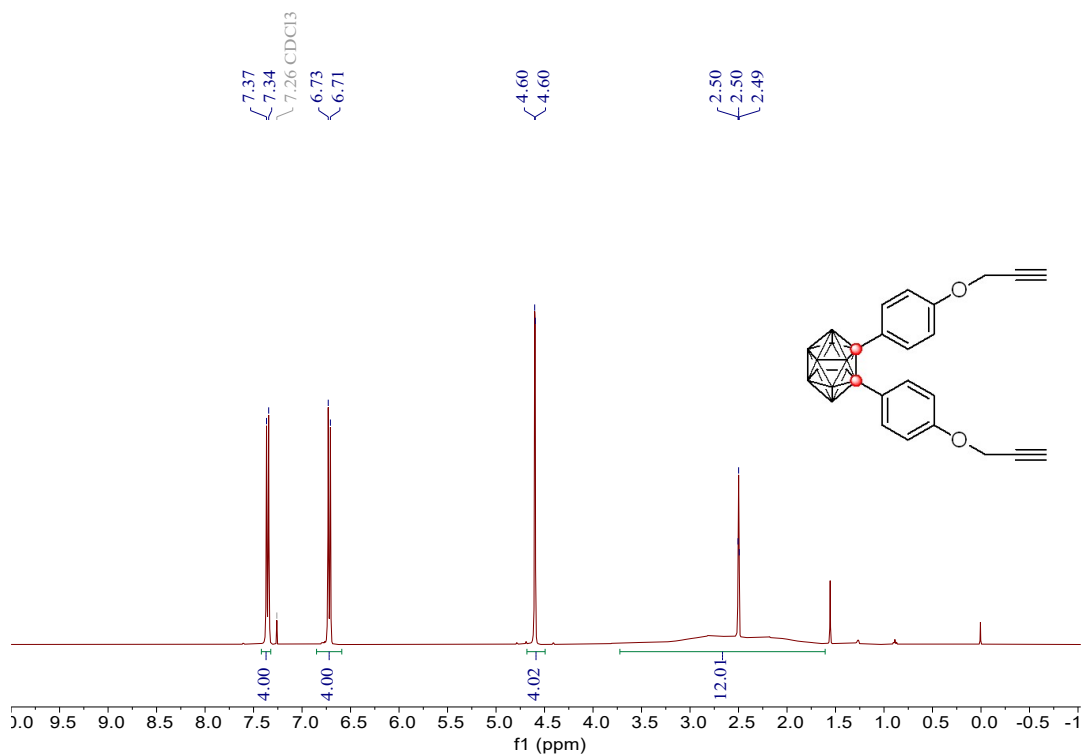

Figure S1  $^1\text{H}$  NMR spectrum of **1-4** (400 MHz,  $\text{CDCl}_3$ )

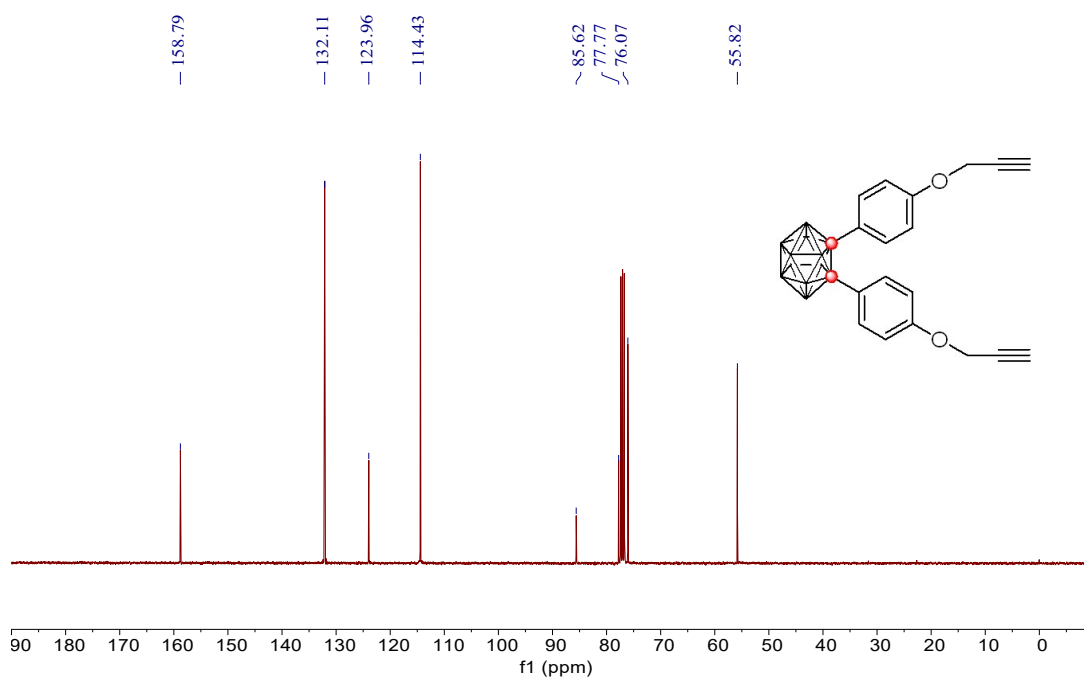

Figure S2  $^{13}\text{C}$  NMR spectrum of **1-4** (100 MHz,  $\text{CDCl}_3$ ).

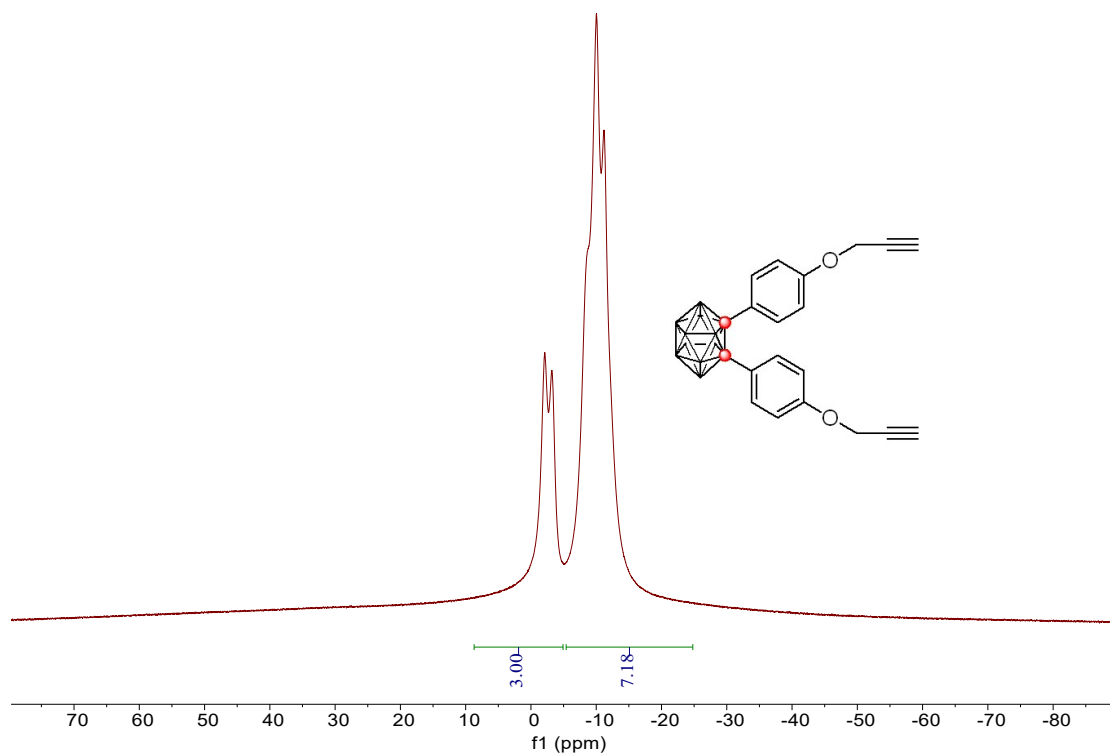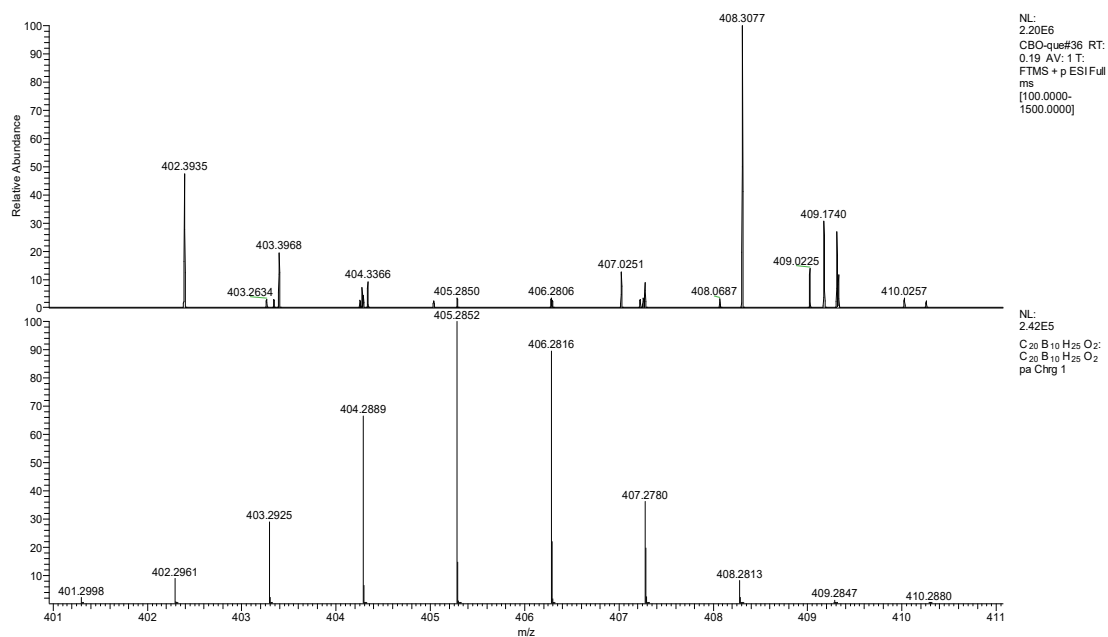

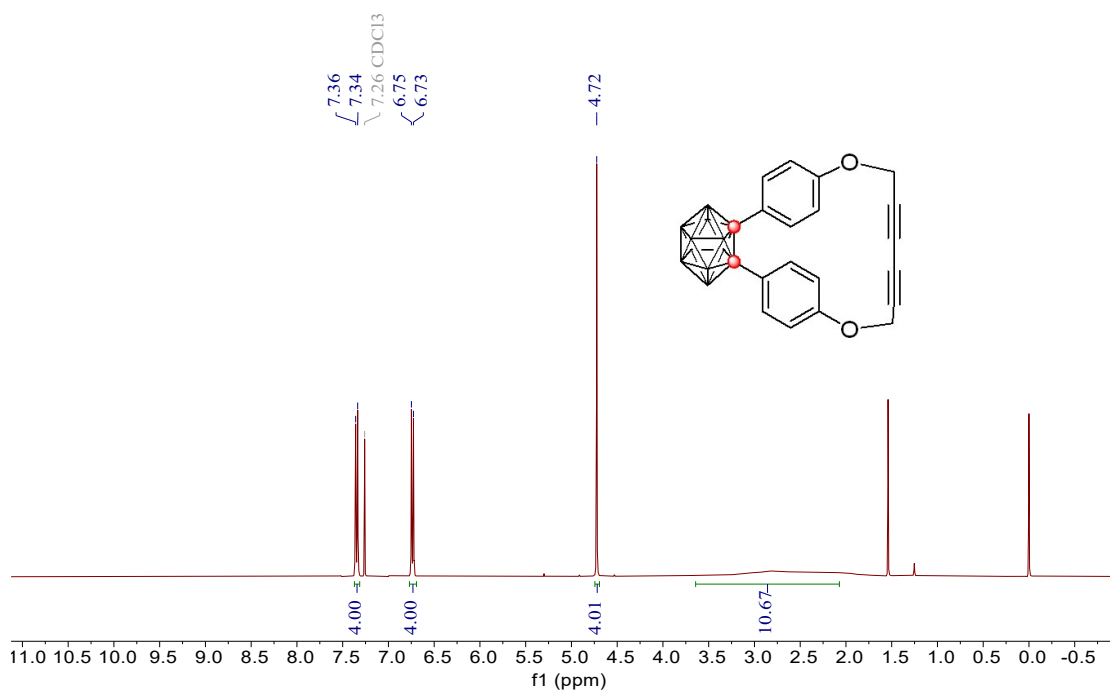

Figure S5 <sup>1</sup>H NMR spectrum of **CBMC-1** (400 MHz, CDCl<sub>3</sub>)

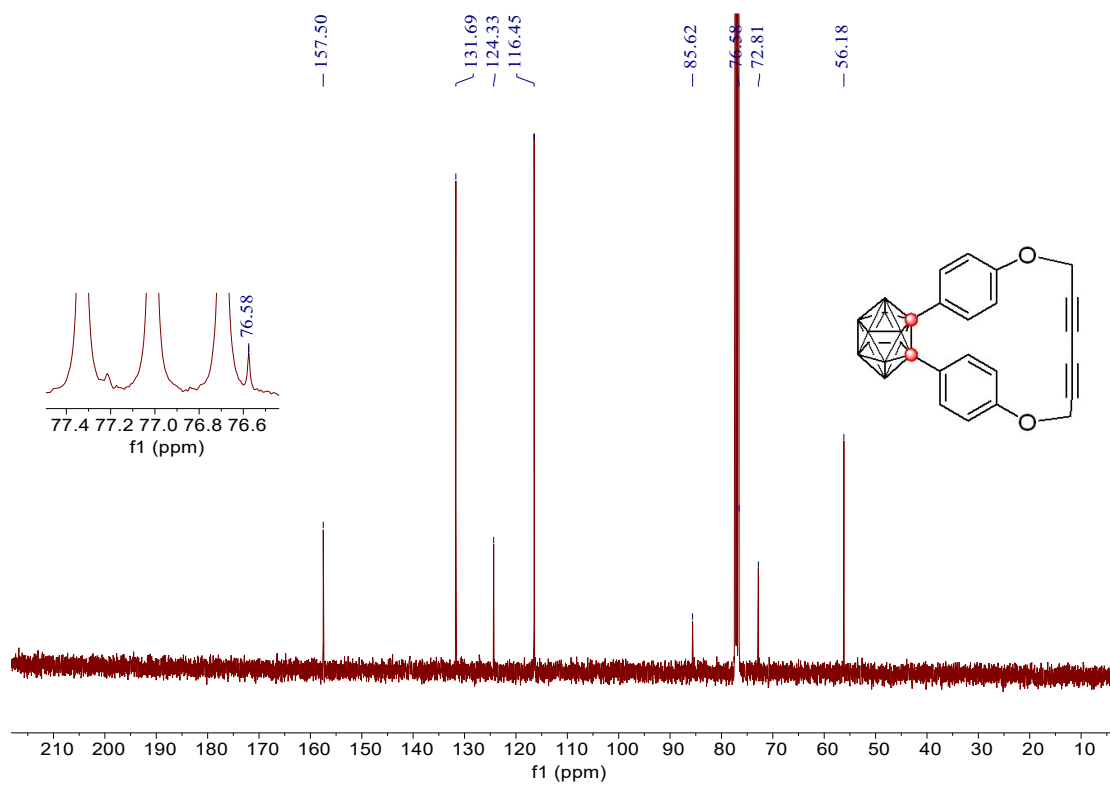

Figure S6 <sup>13</sup>C NMR spectrum of **CBMC-1** (100 MHz, CDCl<sub>3</sub>).

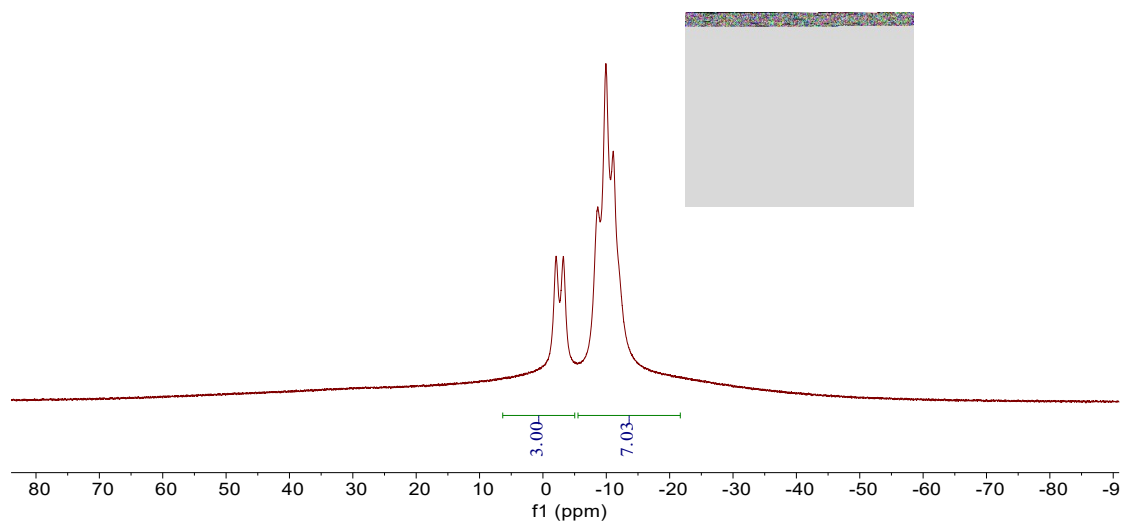

Figure S7  $^{11}\text{B}$  NMR spectrum of **CBMC-1** (128 MHz,  $\text{CDCl}_3$ ).

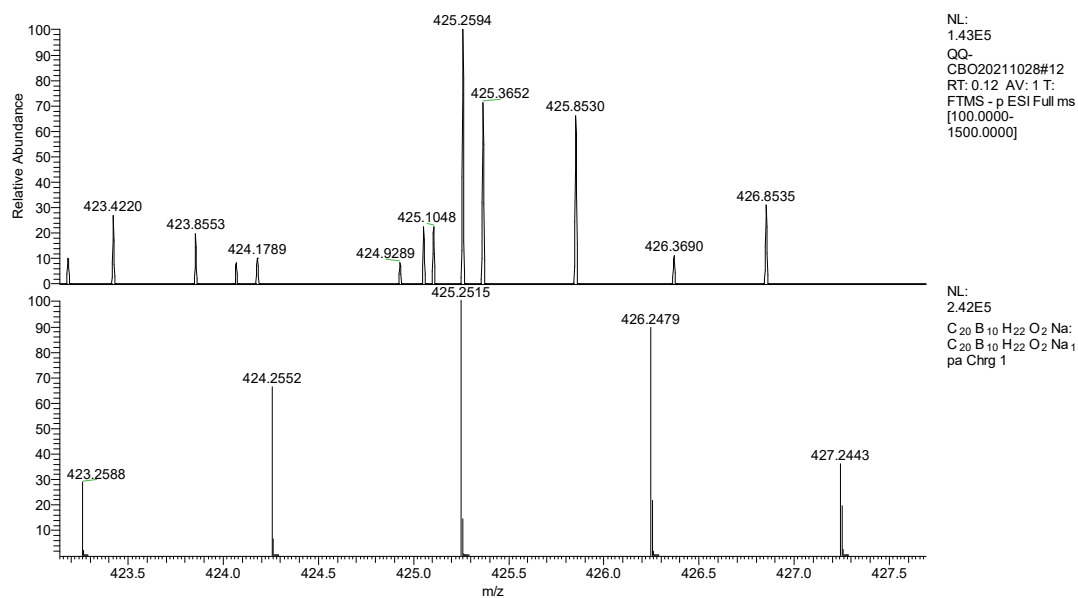

Figure S8 HR-MS (ESI) spectra of **CBMC-1**.

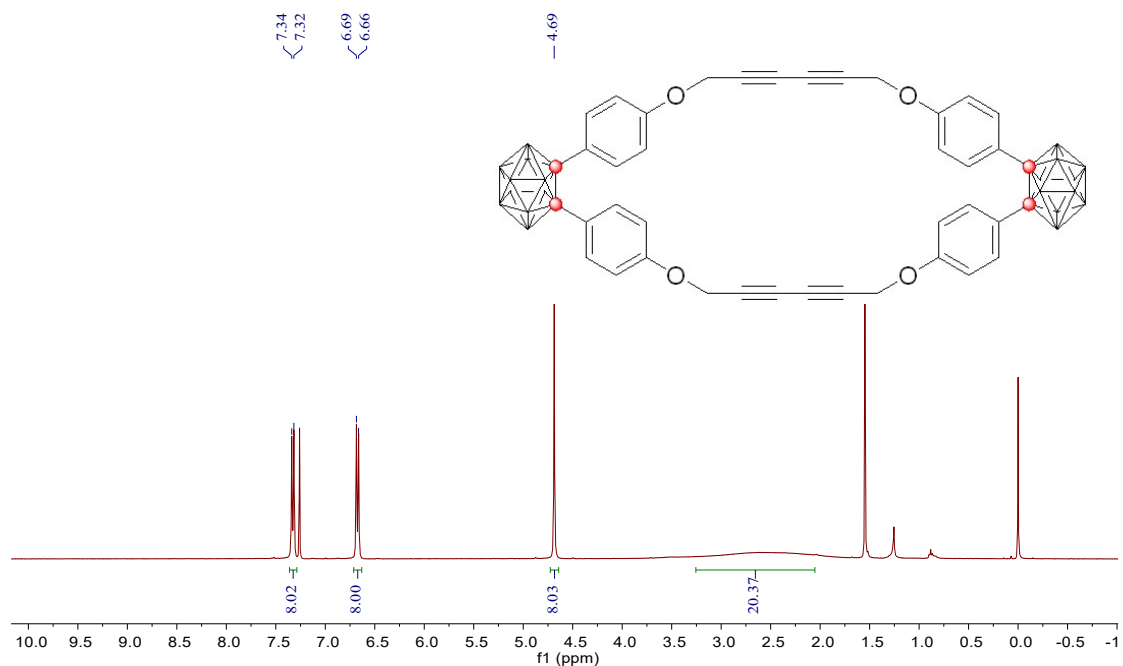

Figure S9  $^1\text{H}$  NMR spectrum of **CBMC-2** (400 MHz,  $\text{CDCl}_3$ ).

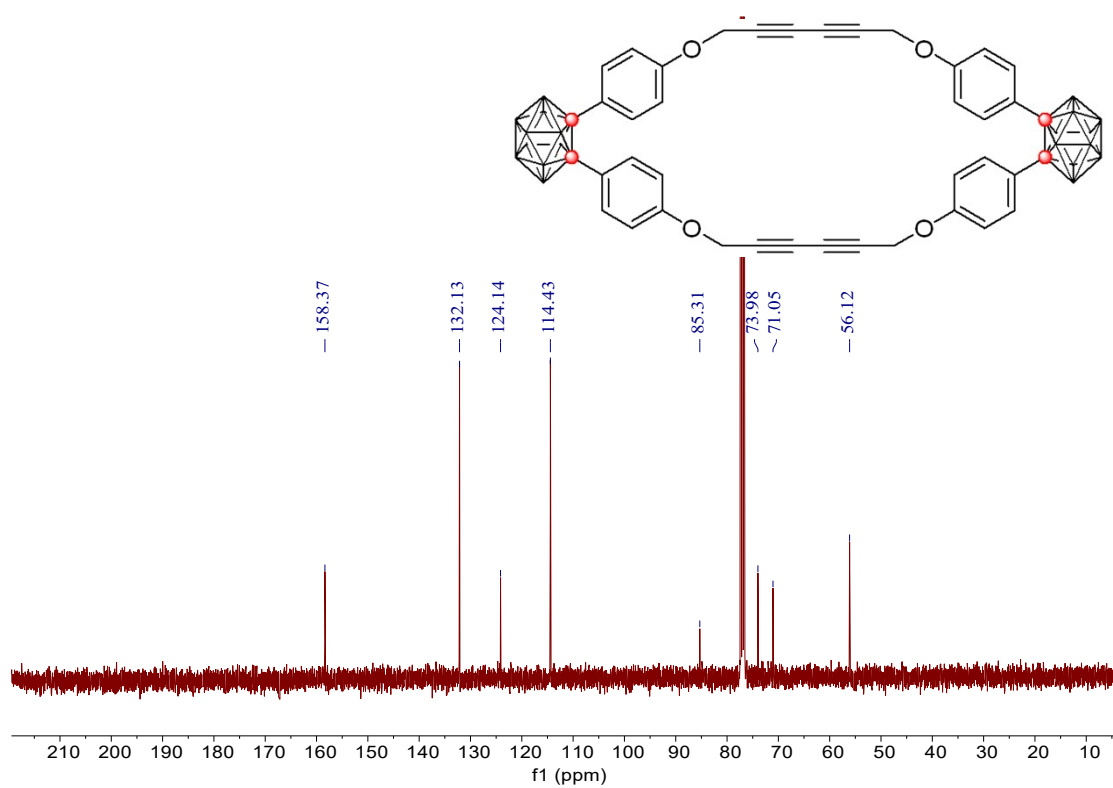

Figure S10  $^{13}\text{C}$  NMR spectrum of **CBMC-2** (100 MHz,  $\text{CDCl}_3$ ).

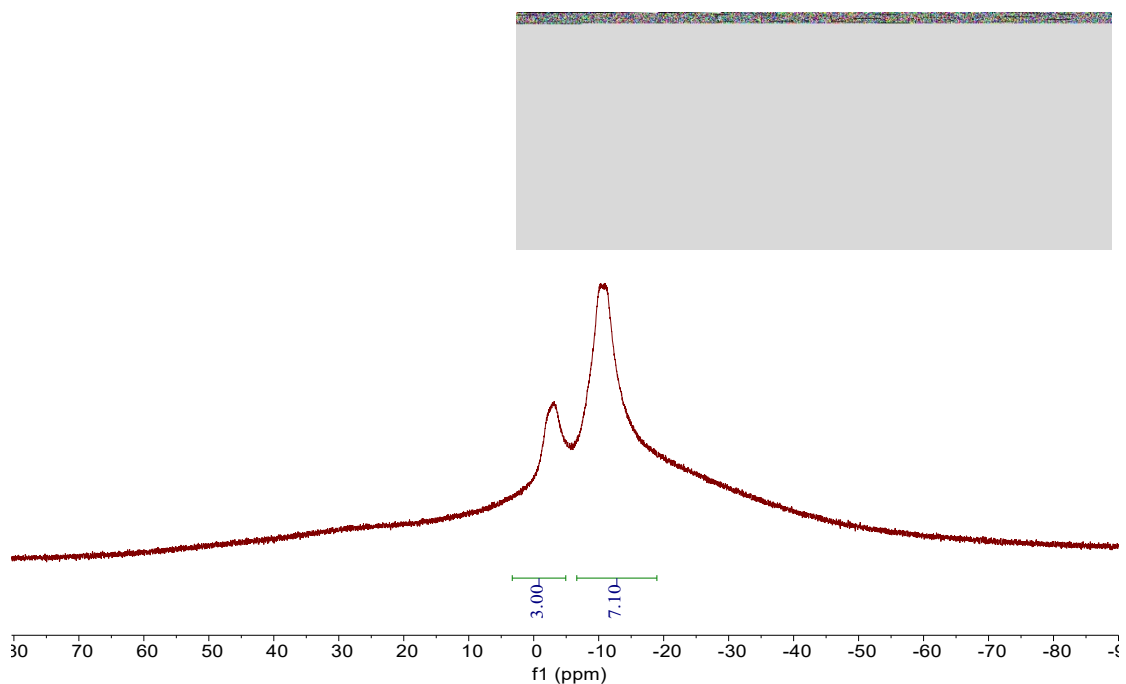

Figure S11  $^{11}\text{B}$  NMR spectrum of **CBMC-2** (128 MHz,  $\text{CDCl}_3$ ).

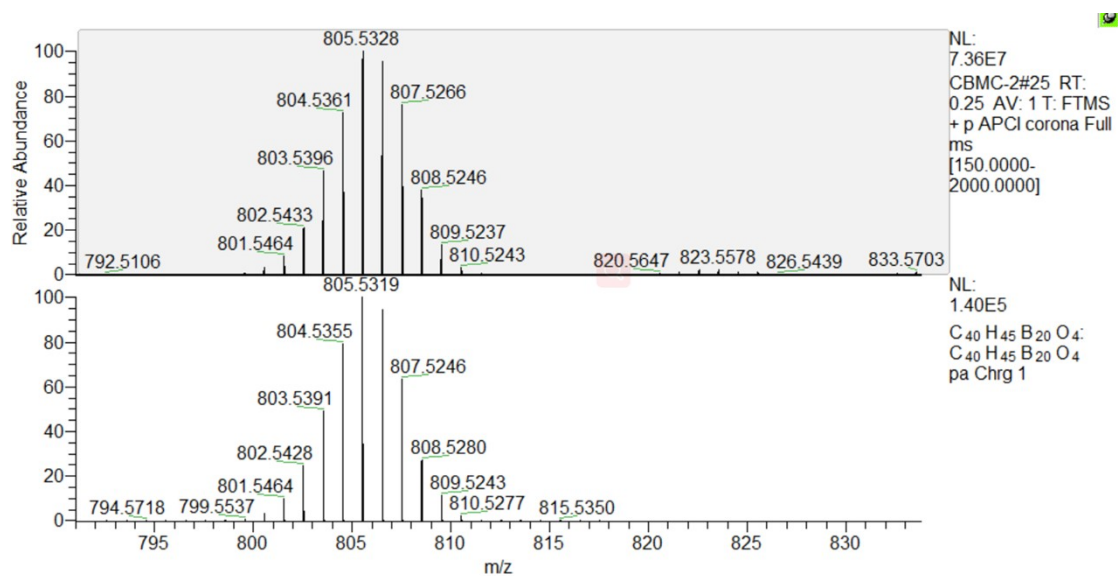

Figure S12 HR-MS (ESI)spectrum of **CBMC-2**.

## 2. DSC plots of crystals of macrocycle **CBMC-2**

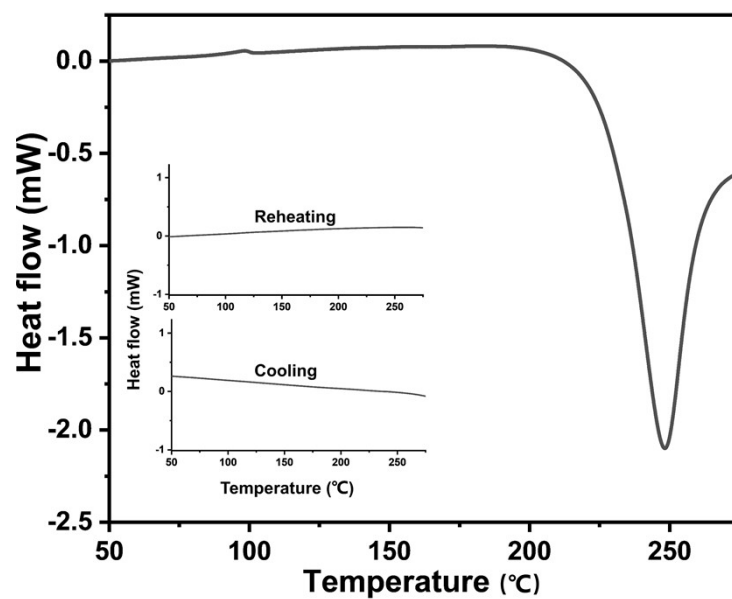

Figure S13 DSC plots of crystals of macrocycle **CBMC-2** (heating rate 10 °C/min). Cooling (10 °C/min) and reheating experiments (Inset).



---

### 3. TGA plot of crystals of macrocycle CBMC-2

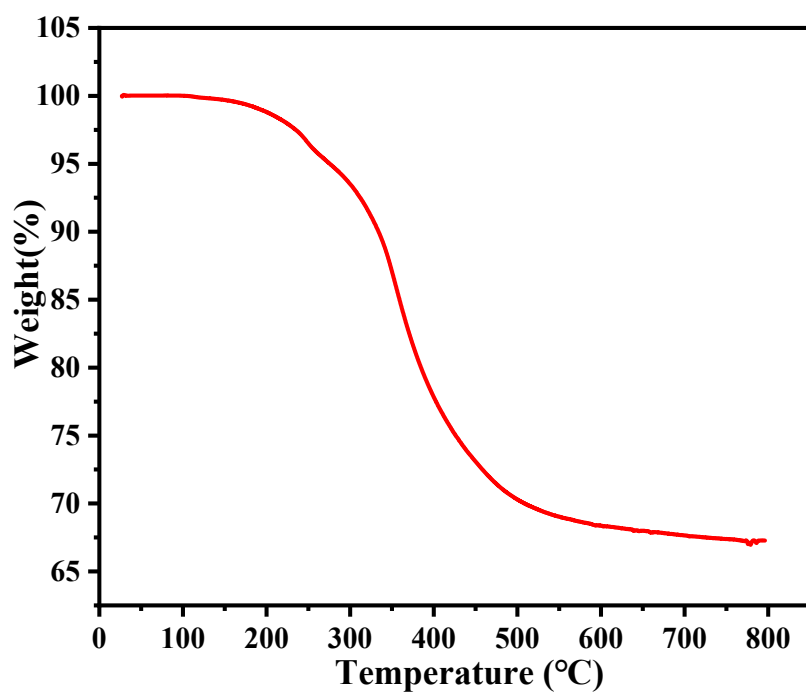

Figure S14 TGA analysis of crystals of macrocycle **CBMC-2** from 25 to 800 °C.

---

#### 4. X-ray crystallography data of macrocycle **CBMC-1** and **CBMC-2**

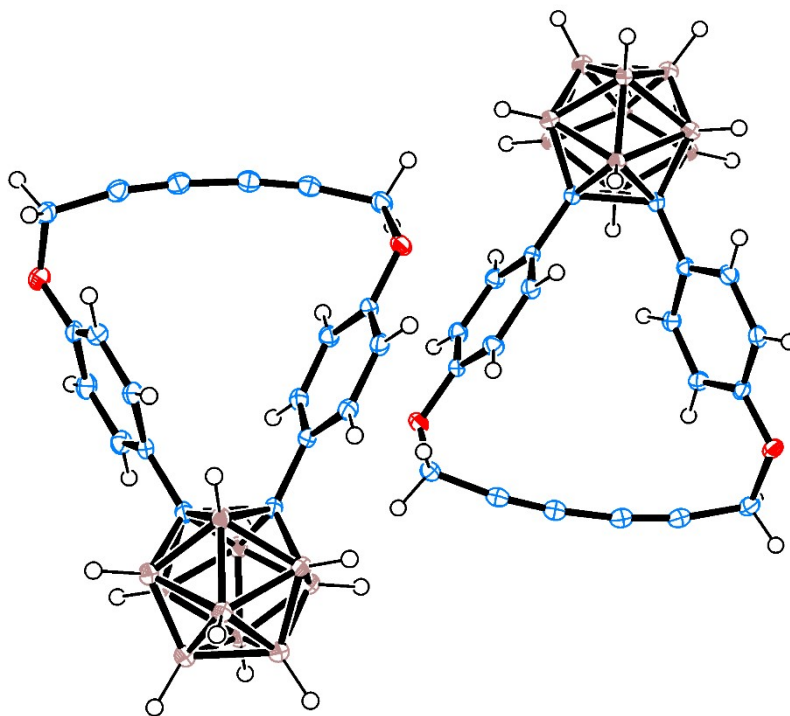

Figure S15 Ortep drawing of 2 in crystal **CBMC-1**(30% probability).

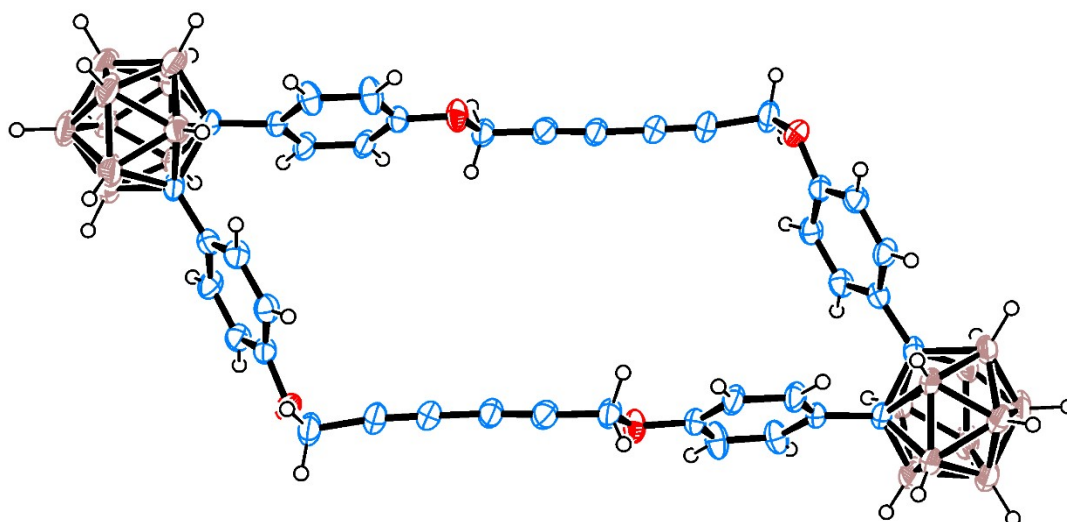

Figure S16 Ortep drawing of 2 in crystal **CBMC-2**(30% probability).

Table S1. Crystal data and structure refinement for **CBMC-1** and **CBMC-2**.

| Identification code                     | <b>CBMC-1</b>                                                    | <b>CBMC-2</b>                                                                    |
|-----------------------------------------|------------------------------------------------------------------|----------------------------------------------------------------------------------|
| <b>Empirical formula</b>                | C <sub>40</sub> H <sub>44</sub> B <sub>20</sub> O <sub>4</sub>   | C <sub>41.5</sub> H <sub>47</sub> B <sub>20</sub> Cl <sub>3</sub> O <sub>4</sub> |
| <b>Formula weight</b>                   | 805.278                                                          | 932.676                                                                          |
| <b>Temperature/K</b>                    | 100.15                                                           | 100.15                                                                           |
| <b>Crystal system</b>                   | monoclinic                                                       | monoclinic                                                                       |
| <b>Space group</b>                      | P2 <sub>1</sub> /n                                               | P2 <sub>1</sub> /c                                                               |
| <b>a/Å</b>                              | 16.25641(16)                                                     | 10.8158(3)                                                                       |
| <b>b/Å</b>                              | 13.27791(13)                                                     | 27.3194(6)                                                                       |
| <b>c/Å</b>                              | 20.2000(2)                                                       | 9.4186(3)                                                                        |
| <b>α/°</b>                              | 90                                                               | 90                                                                               |
| <b>β/°</b>                              | 107.8418(11)                                                     | 113.082(3)                                                                       |
| <b>γ/°</b>                              | 90                                                               | 90                                                                               |
| <b>Volume/Å<sup>3</sup></b>             | 4150.50(8)                                                       | 2560.22(13)                                                                      |
| <b>Z</b>                                | 4                                                                | 2                                                                                |
| <b>ρ<sub>calc</sub>/cm<sup>3</sup></b>  | 1.289                                                            | 1.210                                                                            |
| <b>μ/mm<sup>-1</sup></b>                | 0.547                                                            | 1.916                                                                            |
| <b>F(000)</b>                           | 1668.7                                                           | 962.7                                                                            |
| <b>Crystal size/mm<sup>3</sup></b>      | 0.12×0.11×0.1                                                    | 0.1×0.02×0.01                                                                    |
| <b>Radiation</b>                        | Cu Kα (λ = 1.54184)                                              | Cu Kα (λ = 1.54184)                                                              |
| <b>2θ range for data collection/°</b>   | 6.14 to 153.44                                                   | 8.88 to 153.58                                                                   |
| <b>Index ranges</b>                     | -9 ≤ h ≤ 20,<br>-16 ≤ k ≤ 16,<br>-25 ≤ l ≤ 25                    | -11 ≤ h ≤ 13,<br>-30 ≤ k ≤ 34,<br>-11 ≤ l ≤ 11                                   |
| <b>Reflections collected</b>            | 30042                                                            | 18953                                                                            |
| <b>Independent reflections</b>          | 8441 [R <sub>int</sub> = 0.0242,<br>R <sub>sigma</sub> = 0.0226] | 5137 [R <sub>int</sub> = 0.0374,<br>R <sub>sigma</sub> = 0.0350]                 |
| <b>Data/restraints/parameters</b>       | 8441/0/974                                                       | 5137/0/289                                                                       |
| <b>Goodness-of-fit on F<sup>2</sup></b> | 1.087                                                            | 1.037                                                                            |
| <b>Final R indexes [I ≥ 2σ (I)]</b>     | R <sub>1</sub> = 0.0201,<br>wR <sub>2</sub> = 0.0522             | R <sub>1</sub> = 0.0686,<br>wR <sub>2</sub> = 0.1669                             |
| <b>Final R indexes [all data]</b>       | R <sub>1</sub> = 0.0238,<br>wR <sub>2</sub> = 0.0533             | R <sub>1</sub> = 0.0781,<br>wR <sub>2</sub> = 0.1735                             |
| <b>CCDC number</b>                      | <b>2130685</b>                                                   | <b>2130906</b>                                                                   |

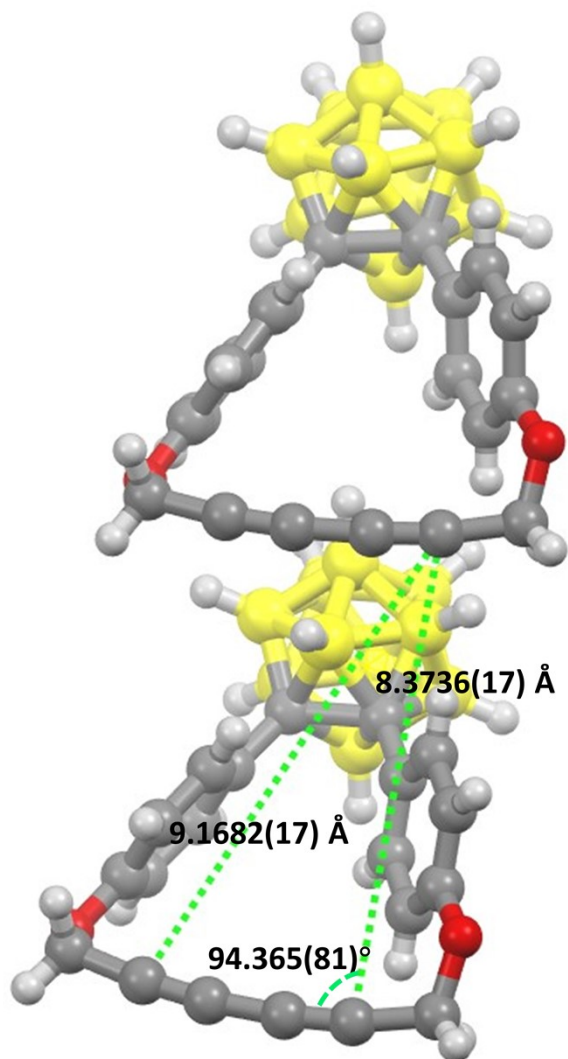

Figure S17 Spatial parameters for topochemical polymerization of **CBMC-1**.

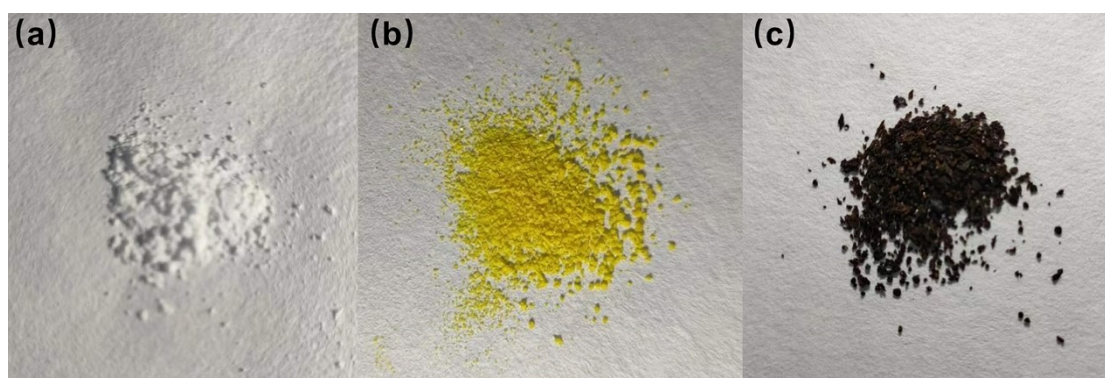

Figure S18 (a) fresh crystals of macrocycle **CBMC-2** after grinding, (b) crystals of macrocycle **CBMC-2** that turned yellow after oven-dry at 60 °C, (c) crystals of macrocycle **CBMC-2** that turned dark black after heating at 250 °C under vacuum atmosphere for 30 min.

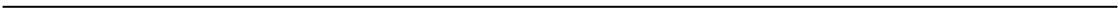

---

## 5. FT-IR spectra of CBMC-2 and PDAs

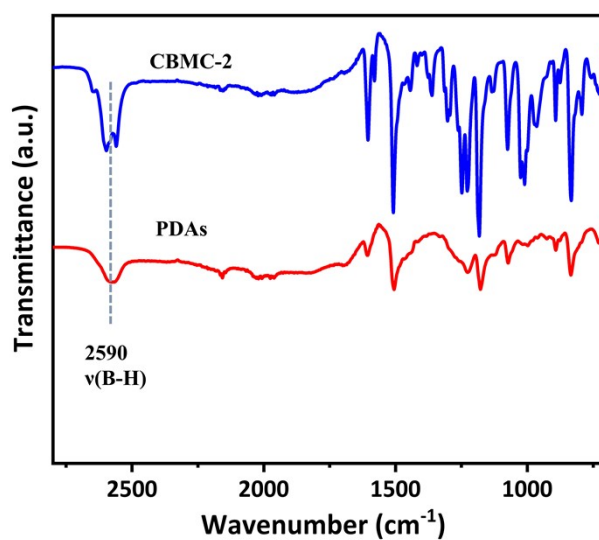

Figure S19 FT-IR spectra of **CBMC-2** (blue line) and **PDAs** (red line)
